# Supplementary material for: Prognostic Value of RNASEH2A-, CDK1-, and CD151-Related Pathway Gene Profiling for Kidney Cancers
Source: PubMed Central journal article supplement (PMC6032436; doi:10.3390/ijms19061586), 2018-05-28
Supplement: ijms-19-01586-s001.pdf [file ijms-19-01586-s001.pdf]

**Table S1.** Clinical characteristics of the ccRCC cohorts.

| Variable          | Group       | TCGA-KIRC | E-GEOD-22541 |
|-------------------|-------------|-----------|--------------|
| Age               | (years old) | 61.1±12.2 | 60.1 ± 8.3*  |
| Gender            | Female      | 188       | 12           |
|                   | Male        | 345       | 32           |
| Fuhrman grade     | G1          | 14        | 3            |
|                   | G2          | 229       | 23           |
|                   | G3          | 206       | 9            |
|                   | G4          | 76        | 0            |
|                   | Gx          | 3         | 0            |
|                   | NA          | 5         | 9            |
| Metastasis status | M0          | 422       | 24           |
|                   | M1          | 79        | 20           |
|                   | Mx          | 30        | 0            |
|                   | NA          | 2         | 0            |

\*The age information in E-GEOD-22541 was only available for 20 patients with M1 status.

**Table S2.** Correlation between gene expression levels and association with RCC patient overall survival (OS)

| Gene            | Correlation with CDK1<br>( <i>r</i> ) | Correlation with RNASEH2A<br>( <i>r</i> ) | Associated with OS* |
|-----------------|---------------------------------------|-------------------------------------------|---------------------|
| <i>C7orf70</i>  | -0.72                                 | 0.31                                      | Y                   |
| <i>ANKRA2</i>   | -0.72                                 | 0.38                                      | N                   |
| <i>ENO2</i>     | -0.72                                 | 0.33                                      | Y                   |
| <i>GPX8</i>     | -0.68                                 | 0.42                                      | Y                   |
| <i>PSMB8</i>    | -0.68                                 | 0.41                                      | N                   |
| <i>DTX2</i>     | -0.66                                 | 0.39                                      | Y                   |
| <i>RFX2</i>     | -0.66                                 | 0.3                                       | N                   |
| <i>RAD9A</i>    | -0.63                                 | 0.33                                      | Y                   |
| <i>NRM</i>      | -0.63                                 | 0.39                                      | Y                   |
| <i>SAP30BP</i>  | -0.61                                 | 0.31                                      | N                   |
| <i>NUBP2</i>    | -0.61                                 | 0.33                                      | N                   |
| <i>TPI1</i>     | -0.6                                  | 0.33                                      | N                   |
| <i>MPG</i>      | -0.6                                  | 0.52                                      | N                   |
| <i>LPGAT1</i>   | -0.58                                 | 0.42                                      | N                   |
| <i>RPL38</i>    | -0.58                                 | 0.45                                      | Y                   |
| <i>C9orf89</i>  | -0.57                                 | 0.35                                      | N                   |
| <i>CD151</i>    | -0.57                                 | 0.3                                       | Y                   |
| <i>HLA-B</i>    | -0.54                                 | 0.34                                      | N                   |
| <i>C16orf42</i> | -0.53                                 | 0.39                                      | N                   |

|               |       |      |   |
|---------------|-------|------|---|
| <i>RUNX1</i>  | -0.52 | 0.52 | Y |
| <i>PSMB9</i>  | -0.52 | 0.52 | Y |
| <i>ZNF668</i> | -0.51 | 0.52 | Y |
| <i>CTU2</i>   | -0.51 | 0.35 | N |
| <i>PRMT2</i>  | -0.5  | 0.43 | N |
| <i>PLXNA3</i> | -0.5  | 0.37 | Y |

---

\*Y: Patients with higher expression levels showed worse OS rate (log rank  $P \leq 0.05$  as calculated by cBioPortal).
